# Supplementary material for: Comprehensive analysis of lectin-glycan interactions reveals determinants of lectin specificity
Source: PubMed Central journal article supplement (PMC8523061; doi:10.1371/journal.pcbi.1009470), 2021-10-06
Supplement: pcbi.1009470.s015.pdf [file pcbi.1009470.s015.pdf]

|    |                                                                      |
|----|----------------------------------------------------------------------|
| 1  | NeuAc(a2-3)Gal(b1-4)Glc                                              |
| 2  | NeuAc(a2-6)Gal(b1-4)GlcNAc                                           |
| 3  | NeuAc(a2-3)Gal(b1-4)GlcNAc                                           |
| 4  | NeuAc(a2-3)Gal                                                       |
| 5  | NeuAc(a2-6)Gal                                                       |
| 6  | NeuAc(a2-6)Gal(b1-4)GlcNAc(b1-3)Gal(b1-4)Glc                         |
| 7  | NeuAc(a2-3)Gal(b1-3)GalNAc(b1-4)[NeuAc(a2-3)]Gal(b1-4)Glc            |
| 8  | NeuAc(a2-6)Gal(b1-4)Glc                                              |
| 9  | NeuAc(a2-3)Gal(b1-3)GlcNAc                                           |
| 10 | NeuAc(a2-3)Gal(b1-3)GlcNAc(b1-3)Gal(b1-4)Glc                         |
| 11 | NeuAc(a2-3)Gal(b1-3)[NeuAc(a2-6)]GlcNAc                              |
| 12 | NeuAc(a2-8)NeuAc(a2-3)Gal(b1-4)Glc                                   |
| 13 | NeuAc(a2-8)NeuAc(a2-3)Gal                                            |
| 14 | NeuAc(a2-6)GalNAc                                                    |
| 15 | NeuAc(a2-6)GlcNAc                                                    |
| 16 | NeuAc(a2-3)Gal(b1-3)GalNAc                                           |
| 17 | NeuAc(a2-3)Gal(b1-3)GalNAc(b1-3)Gal(a1-4)Gal(b1-4)Glc                |
| 18 | NeuAc(a2-8)NeuAc                                                     |
| 19 | NeuAc(a2-8)NeuAc(a2-3)Gal(b1-3)GalNAc(b1-4)[NeuAc(a2-3)]Gal          |
| 20 | NeuAc(a2-3)Gal(b1-3)GalNAc(b1-4)Gal                                  |
| 21 | NeuAc(a2-8)NeuAc(a2-3)Gal(b1-3)GalNAc(b1-4)Gal                       |
| 22 | NeuAc(a2-6)Gal(b1-4)GlcNAc(b1-3)Gal                                  |
| 23 | NeuAc(a2-3)Gal(a1-4)GlcNAc                                           |
| 24 | NeuAc(a2-6)Gal;NeuAc(a2-6)Gal(b1-4)GlcNAc                            |
| 25 | NeuAc(a2-3)Gal(b1-3)GalNAc(b1-4)[NeuAc(a2-8)NeuAc(a2-3)]Gal(b1-4)Glc |
| 26 | NeuAc(a2-8)NeuAc(a2-8)NeuAc                                          |
| 27 | NeuAc(a2-3)Gal(b1-3)[NeuAc(a2-6)]GalNAc                              |

**S1 Table.** UniLectin3D-assigned IUPAC glycan names within the terminal NeuAc group of glycans.
