# Supplementary material for: Comprehensive analysis of lectin-glycan interactions reveals determinants of lectin specificity
Source: PubMed Central journal article supplement (PMC8523061; doi:10.1371/journal.pcbi.1009470), 2021-10-06
Supplement: pcbi.1009470.s016.pdf [file pcbi.1009470.s016.pdf]

|    |                                                                                                         |
|----|---------------------------------------------------------------------------------------------------------|
| 1  | Man(a1-2)Man(a1-2)Man                                                                                   |
| 2  | Man(a1-6)[Man(a1-3)]Man                                                                                 |
| 3  | Man(a1-3)[Man(a1-6)]Man                                                                                 |
| 4  | Man(a1-6)[Man(a1-3)]Man(a1-6)[Man(a1-3)]Man                                                             |
| 5  | Man(a1-6)[Man(a1-3)]Man(a1-6)Man                                                                        |
| 6  | Man(a1-2)Man(a1-3)Man                                                                                   |
| 7  | Man(a1-6)[Man(a1-3)]Man(a1-6)[Man(a1-2)Man(a1-3)]Man                                                    |
| 8  | Man(a1-3)[Man(a1-6)]Man(b1-4)GlcNAc(b1-4)GlcNAc                                                         |
| 9  | Man(a1-2)Man(a1-3)[Man(a1-2)Man(a1-6)]Man                                                               |
| 10 | Man(a1-2)Man(a1-3)[Man(a1-3)Man(a1-6)]Man                                                               |
| 11 | Man(a1-3)Man(a1-3)Man                                                                                   |
| 12 | Man(a1-6)Man(a1-6)Man                                                                                   |
| 13 | Man(a1-2)Man(a1-3)[Man(a1-6)]Man(a1-6)[Man(a1-2)Man(a1-2)Man(a1-3)]Man                                  |
| 14 | Man(a1-2)Man(a1-6)[Man(a1-3)]Man(a1-6)Man                                                               |
| 15 | Man(a1-2)Man(a1-6)[Man(a1-2)Man(a1-3)]Man(a1-6)[Man(a1-2)Man(a1-2)Man(a1-3)]Man(b1-4)GlcNAc(b1-4)GlcNAc |
| 16 | Man(a1-2)Man(a1-3)[Man(a1-6)]Man                                                                        |

**S2 Table. UniLectin3D-assigned IUPAC glycan names within the high mannose group of glycans.**
