# Supplementary material for: Comprehensive analysis of lectin-glycan interactions reveals determinants of lectin specificity
Source: PubMed Central journal article supplement (PMC8523061; doi:10.1371/journal.pcbi.1009470), 2021-10-06
Supplement: pcbi.1009470.s017.pdf [file pcbi.1009470.s017.pdf]

|    |                                                                                                            |
|----|------------------------------------------------------------------------------------------------------------|
| 1  | Fuc(a1-2)Gal(b1-4)Glc                                                                                      |
| 2  | Fuc(a1-2)Gal(b1-4)[Fuc(a1-3)]GlcNAc                                                                        |
| 3  | Fuc(a1-2)Gal(b1-4)GlcNAc                                                                                   |
| 4  | Fuc(a1-2)Gal(b1-3)[Fuc(a1-4)]GlcNAc                                                                        |
| 5  | Fuc(a1-2)Gal(b1-3)GlcNAc(b1-3)Gal(b1-4)Glc                                                                 |
| 6  | Fuc(a1-2)Gal(b1-3)GlcNAc                                                                                   |
| 7  | Fuc(a1-2)Gal(b1-3)[Fuc(a1-4)]GlcNAc(b1-3)Gal(b1-4)Glc                                                      |
| 8  | Fuc(a1-6)GlcNAc                                                                                            |
| 9  | Fuc(a1-2)Gal(b1-3)[Fuc(a1-4)]GlcNAc(b1-3)Gal                                                               |
| 10 | Fuc(a1-2)Gal(b1-2)Xyl                                                                                      |
| 11 | Fuc(a1-2)Gal(b1-3)GlcNAc(b1-3)Gal                                                                          |
| 12 | Fuc(a1-4)GlcNAc                                                                                            |
| 13 | Fuc(a1-2)Gal(b1-3)GalNAc(b1-3)Gal(a1-4)Gal                                                                 |
| 14 | Fuc(a1-2)Gal                                                                                               |
| 15 | Gal(b1-4)[Fuc(a1-3)]GlcNAc(b1-3)Gal(b1-4)Glc                                                               |
| 16 | Gal(b1-4)[Fuc(a1-3)]GlcNAc                                                                                 |
| 17 | Gal(a1-3)[Fuc(a1-2)]Gal                                                                                    |
| 18 | GalNAc(a1-3)[Fuc(a1-2)]Gal(b1-3)[Fuc(a1-4)]GlcNAc                                                          |
| 19 | Gal(a1-3)[Fuc(a1-2)]Gal(b1-3)[Fuc(a1-4)]GlcNAc(b1-3)Gal(b1-4)Glc                                           |
| 20 | GalNAc(a1-3)[Fuc(a1-2)]Gal(b1-3)GlcNAc(b1-3)Gal(b1-4)Glc                                                   |
| 21 | GalNAc(a1-3)[Fuc(a1-2)]Gal(b1-4)[Fuc(a1-3)]Glc                                                             |
| 22 | GalNAc(a1-3)[Fuc(a1-2)]Gal(b1-4)[Fuc(a1-3)]GlcNAc                                                          |
| 23 | GalNAc(a1-3)[Fuc(a1-2)]Gal                                                                                 |
| 24 | Gal(a1-3)[Fuc(a1-2)]Gal(b1-4)Glc                                                                           |
| 25 | Gal(b1-4)[Fuc(a1-3)]GlcNAc(b1-4)Glc                                                                        |
| 26 | Gal(b1-4)[Fuc(a1-3)]GlcNAc(b1-3)Gal                                                                        |
| 27 | Gal(b1-3)[Fuc(a1-4)]GlcNAc                                                                                 |
| 28 | Gal(b1-3)[Fuc(a1-4)]GlcNAc(b1-3)Gal                                                                        |
| 29 | GalNAc(a1-3)[Fuc(a1-2)]Gal(b1-4)GlcNAc                                                                     |
| 30 | GalNAc(a1-3)[Fuc(a1-2)]Gal(b1-4)Glc                                                                        |
| 31 | Gal(b1-4)[Fuc(a1-3)]GlcNAc(b1-2)Man(a1-3)[GlcNAc(b1-2)Man(a1-6)]<br>Man(b1-4)GlcNAc(b1-4)[Fuc(a1-6)]GlcNAc |
| 32 | Gal(a1-3)[Fuc(a1-2)]Gal(b1-3)GlcNAc(b1-3)Gal(b1-4)Glc                                                      |
| 33 | GalNAc(a1-3)[Fuc(a1-2)]Gal(b1-3)GlcNAc                                                                     |
| 34 | Gal(b1-4)[Fuc(a1-3)]Glc                                                                                    |
| 35 | GlcNAc(b1-4)[Fuc(a1-3)]GlcNAc                                                                              |

**S3 Table.** UniLectin3D-assigned IUPAC glycan names within the terminal fucose group of glycans.
