# Supplementary material for: Comprehensive analysis of lectin-glycan interactions reveals determinants of lectin specificity
Source: PubMed Central journal article supplement (PMC8523061; doi:10.1371/journal.pcbi.1009470), 2021-10-06
Supplement: pcbi.1009470.s018.pdf [file pcbi.1009470.s018.pdf]

|   |                                              |
|---|----------------------------------------------|
| 1 | NeuAc(a2-6)Gal(b1-4)GlcNAc                   |
| 2 | NeuAc(a2-6)Gal(b1-4)GlcNAc(b1-3)Gal(b1-4)Glc |
| 3 | NeuAc(a2-6)Gal                               |
| 4 | NeuAc(a2-6)Gal(b1-4)GlcNAc(b1-3)Gal          |
| 5 | NeuAc(a2-6)Gal;NeuAc(a2-6)Gal(b1-4)GlcNAc    |

**S4 Table. UniLectin3D-assigned IUPAC glycan names within the 6'  $\alpha$ NeuAc-terminal glycans complexed with influenza hemagglutinin.**
