# Supplementary material for: Comprehensive analysis of lectin-glycan interactions reveals determinants of lectin specificity
Source: PubMed Central journal article supplement (PMC8523061; doi:10.1371/journal.pcbi.1009470), 2021-10-06
Supplement: pcbi.1009470.s019.pdf [file pcbi.1009470.s019.pdf]

|   |                                              |
|---|----------------------------------------------|
| 1 | NeuAc(a2-3)Gal(b1-3)GlcNAc(b1-3)Gal(b1-4)Glc |
| 2 | NeuAc(a2-3)Gal(b1-4)GlcNAc                   |
| 3 | NeuAc(a2-3)Gal(b1-4)Glc                      |
| 4 | NeuAc(a2-3)Gal                               |
| 5 | NeuAc(a2-3)Gal(a1-4)GlcNAc                   |
| 6 | NeuAc(a2-3)Gal(a1-4)[Fuc(a1-3)]GlcNAc        |
| 7 | NeuAc(a2-3)Gal(b1-3)GlcNAc                   |

**S5 Table. UniLectin3D-assigned IUPAC glycan names within the 3'  $\alpha$ NeuAc-terminal glycans complexed with influenza hemagglutinin.**
